# Supplementary material for: Na0.97KFe(SO4)2: an iron-based sulfate cathode material with outstanding cyclability and power capability for Na-ion batteries
Source: Royal Society of Chemistry journal article supplement (doi:10.1039/c8ta05854g), 2018-01-01
Supplement: c8ta05854g1.pdf [file c8ta05854g1.pdf]

## Supporting Information

### **Na<sub>0.97</sub>KFe(SO<sub>4</sub>)<sub>2</sub>: New iron-based sulfate cathode material with outstanding cyclability and power-capability for Na-ion batteries**

*Wonseok Ko<sup>1</sup>, Teahoon Park<sup>2</sup>, Hyunyoung Park<sup>1</sup>, Yongseok Lee<sup>1</sup>, Kang Eun Lee<sup>2</sup>, and Jongsoon Kim<sup>1,\*</sup>*

<sup>1</sup>Department of Nanotechnology and Advanced Materials Engineering, Sejong University, Seoul, 05006, Republic of Korea.

<sup>2</sup>Carbon Composites Department, Composites Research Division, Korea Institute of Materials Science (KIMS), 797 Changwondaero, Changwon, Republic of Korea

Corresponding Authors: Prof. Jongsoon Kim (E-mail: [jongsoonkim@sejong.ac.kr](mailto:jongsoonkim@sejong.ac.kr))

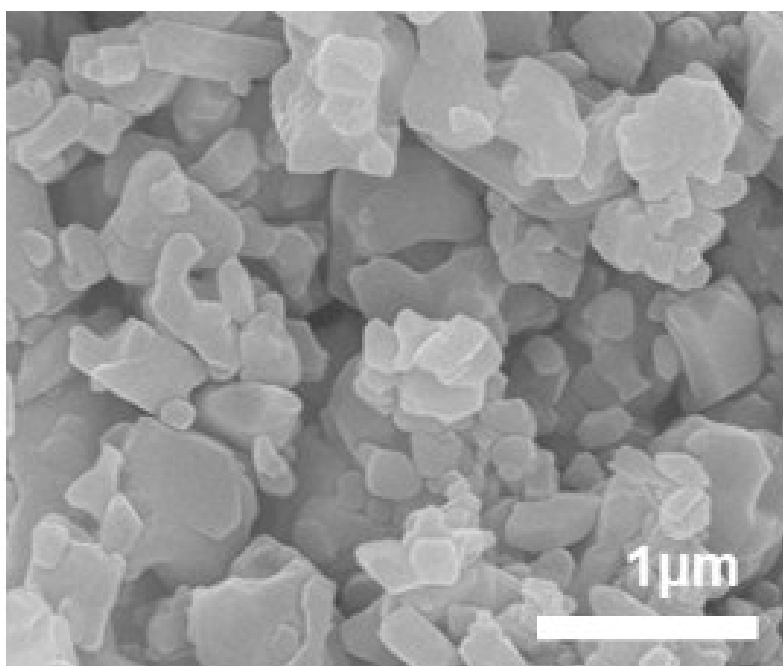

**Supporting Figure S1.** SEM image of bare  $\text{KFe}(\text{SO}_4)_2$  powder.

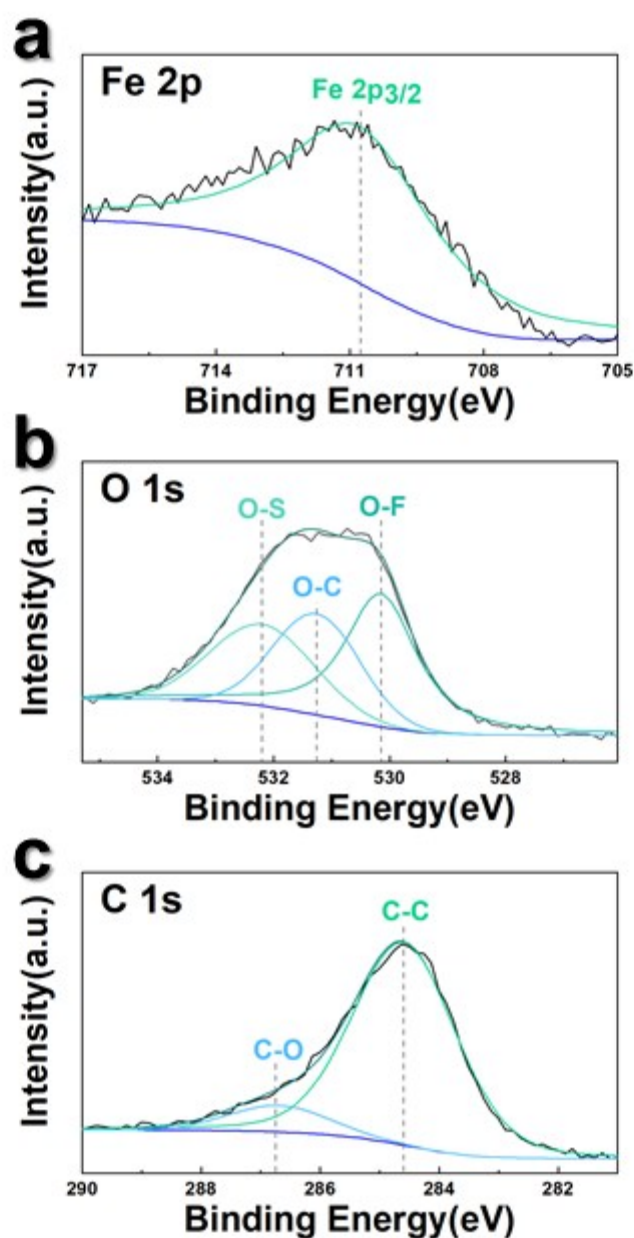

**Supporting Figure S2.** XPS spectra of  $\text{KFe}(\text{SO}_4)_2$ . (a) Fe 2p peak as Fe 2p<sub>3/2</sub> (710.8eV)<sup>1</sup>, (b) O 1s peaks as O-S (532.2eV)<sup>2</sup>, O-F (~529.9eV)<sup>2</sup> and O-C(532.1eV)<sup>3</sup>, (c) C 1s peaks as C-C (284.6eV)<sup>4</sup> and C-O (286.75eV)<sup>5</sup>.

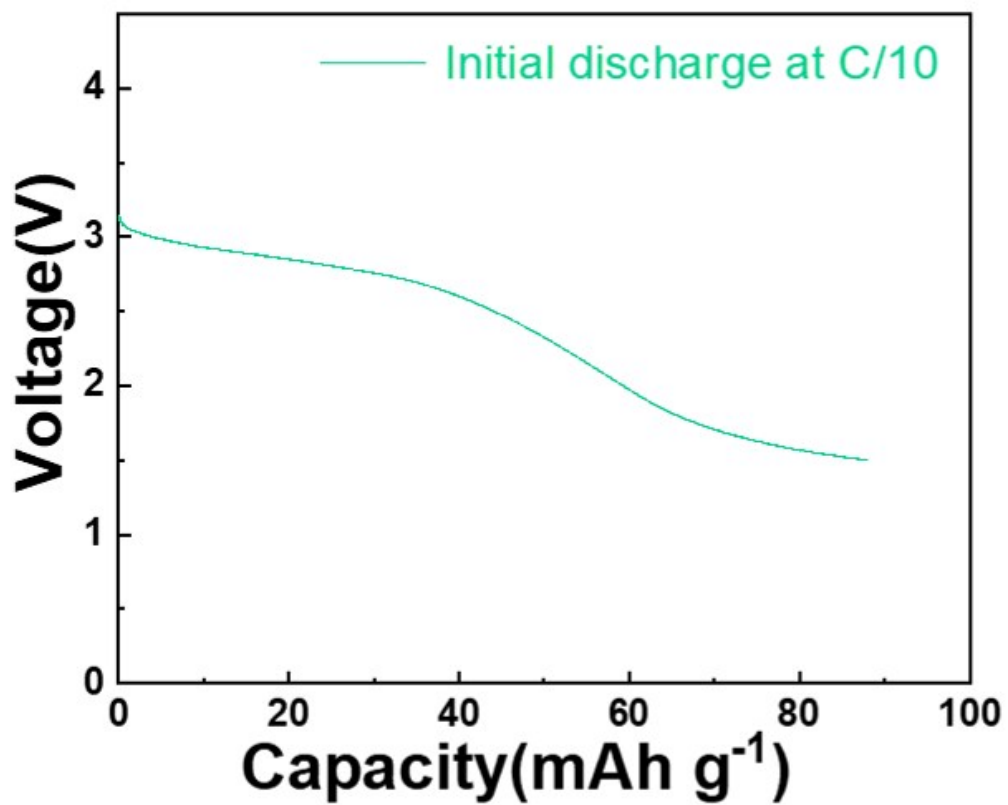

Supporting Figure S3 Initial discharge curve of  $\text{Na}_{0.97}\text{KFe}(\text{SO}_4)_2$  measured at C/10

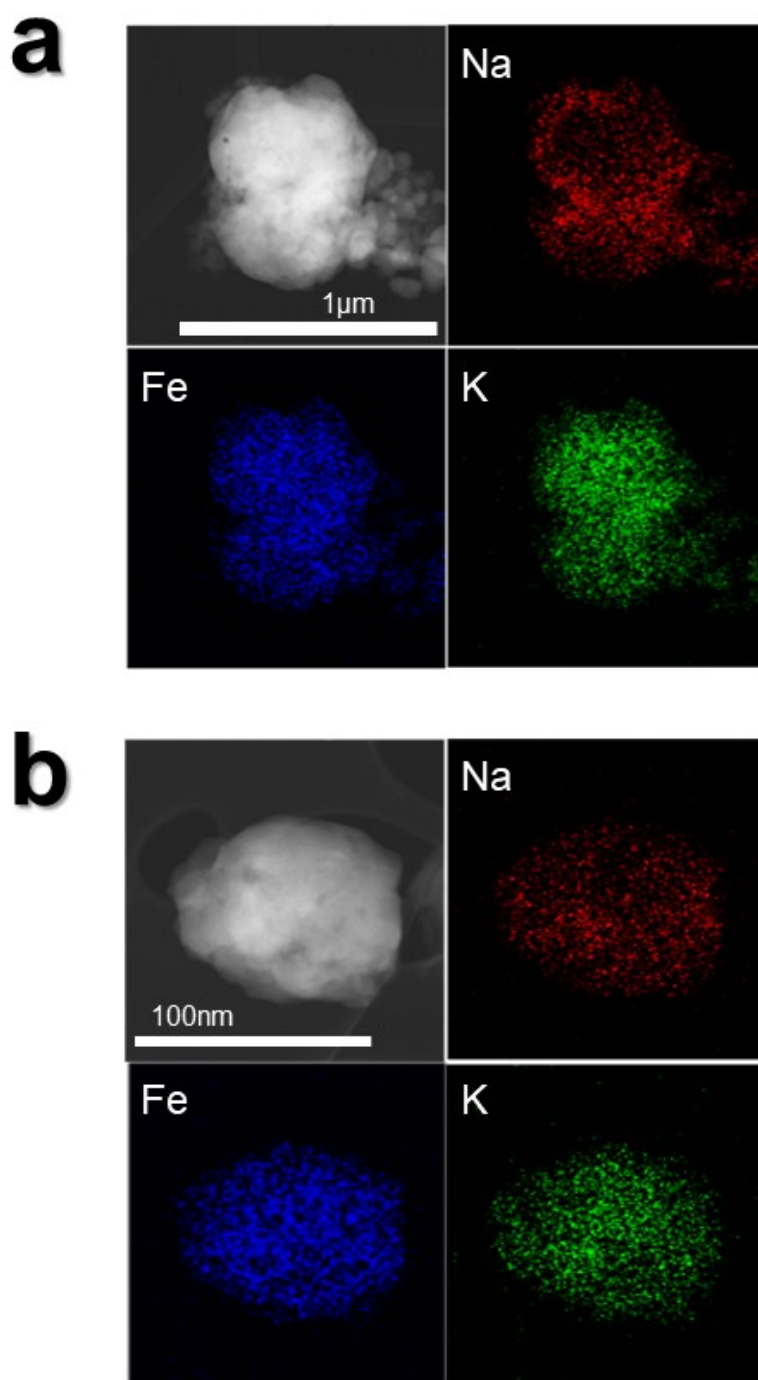

**Supporting Figure S4** TEM EDS mapping of  $\text{Na}_{0.97}\text{KFe}(\text{SO}_4)_2$  after (a) 200 cycles (atomic ratio of Na and K = 1.10 : 1) and (b) 2 cycles (atomic ratio of Na and K = 1.03 : 1).

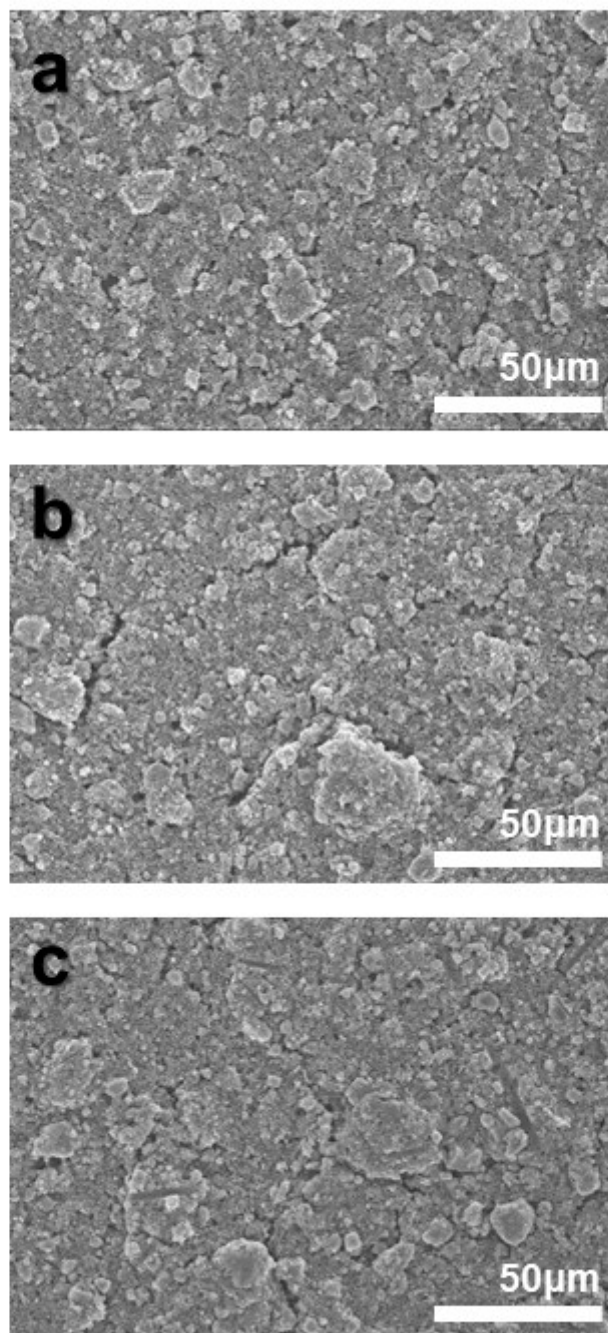

**Supporting Figure S5** SEM images of electrodes. (a) before cycling, (b) after 100 cycles, (c) after 200cycles.

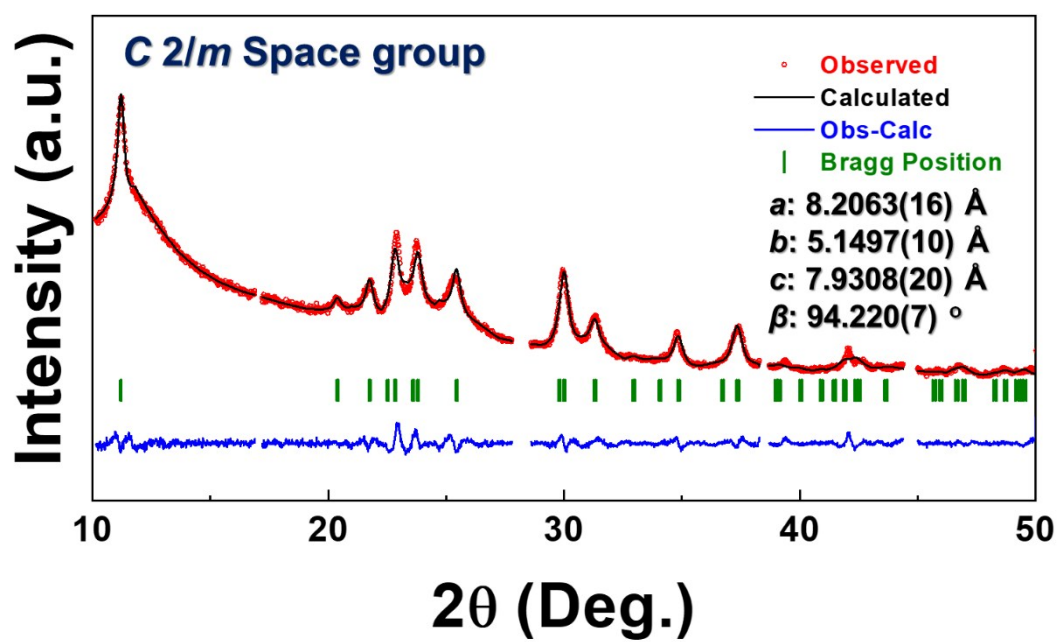

Supporting Figure S6 Refined XRD pattern of after 200cycles  $\text{Na}_0\text{KFe}(\text{SO}_4)_2$  ( $R_p = 2.47\%$ ,  $R_I = 1.81\%$ ,  $R_F = 1.25\%$ ,  $\chi^2 = 2.02\%$ )

| Atom | Multiplicity | <i>x</i>  | <i>y</i>  | <i>z</i>  | B <sub>iso</sub> | Occupancy |
|------|--------------|-----------|-----------|-----------|------------------|-----------|
| Fe   | 2            | 0.00000   | 0.00000   | 0.00000   | 0.88(6)          | 1         |
| K    | 2            | 0.00000   | 0.00000   | 0.50000   | 1.50(8)          | 1         |
| S    | 4            | 0.3713(3) | 0         | 0.2072(3) | 0.79(7)          | 1         |
| O1   | 4            | 0.2466(6) | 0         | 0.0719(6) | 0.73(8)          | 1         |
| O2   | 4            | 0.3113(7) | 0         | 0.3795(6) | 0.73(8)          | 1         |
| O3   | 8            | 0.4726(4) | 0.2332(5) | 0.1875(4) | 0.73(8)          | 1         |

**Supporting Table T1.** The structural information of KFe(SO<sub>4</sub>)<sub>2</sub> using Rietveld refinement calculation.



|                         | <b>Na</b> | <b>K</b> | <b>Fe</b> |
|-------------------------|-----------|----------|-----------|
| Pristine sample         | 0         | 0.988(6) | 0.998(3)  |
| Fully discharged sample | 0.989(5)  | 0.981(7) | 0.995(5)  |
| 200 times cycled sample | 0.987(6)  | 0.982(5) | 0.996(3)  |

**Supporting Table T2** ICP analyses on the atomic ratio of Na, K, Fe in the pristine sample, the fully discharged sample and the 200 times cycled sample of  $\text{Na}_{0.97}\text{KFe}(\text{SO}_4)_2$  with standard deviation.

## References

1. A. P. Grosvenor, B. A. Kobe, M. C. Biesinger and N. S. McIntyre, *Surface and Interface Analysis*, 2004, **36**, 1564-1574.
2. G. Beamson, D. Briggs, *High resolution XPS of organic polymers, the scienta ESCA300 database*, Wiley, 1992.
3. D. H. Wang, Y. Hu, J. J. Zhao, L. L. Zeng, X. M. Tao and W. Chen, *Journal of Materials Chemistry A*, 2014, **2**, 17415-17420.
4. M. X. Wu, Q. B. Feng, X. Sun, H. L. Wang, G. Gielen and W. X. Wu, *Scientific Reports*, 2015, **5**.
5. N. V. Bhat, D. J. Upadhyay, R. R. Deshmukh and S. K. Gupta, *Journal of Physical Chemistry B*, 2003, **107**, 4550-4559.
